# Supplementary material for: Cost-effective conversion of “stones” into high-performance capacitor carbon through a solid–solid inorganic chemical reaction
Source: Royal Society of Chemistry journal article supplement (doi:10.1039/d4qi01715c), 2024-01-01
Supplement: d4qi01715c1.pdf [file d4qi01715c1.pdf]

## Supporting Information

### Cost-Effective Conversion of "Stones" into High-Performance Capacitor Carbon through Solid-Solid Inorganic Chemical Reaction

Yongfeng Bu<sup>a</sup>, Shihao Wang<sup>a</sup>, Yuman Li<sup>a</sup>, Shengda Tang<sup>b</sup>, Qin Kang<sup>a</sup>, Zhaomin Zhu<sup>a</sup>, Hui Li<sup>b</sup>, Li Pan<sup>b</sup>, Hongyu Liang<sup>b,\*</sup>

<sup>a</sup>*Institute for Energy Research, Jiangsu University, Zhenjiang, 212013, China*

<sup>b</sup>*Institute of Advanced Manufacturing and Modern Equipment Technology, School of Mechanical Engineering, Jiangsu University, Zhenjiang, 212013, China*

\*E-mail address: [hyliang@ujs.edu.cn](mailto:hyliang@ujs.edu.cn)

#### Contents:

#### Supplementary Figs. S1-S7 and Tables S1-S3

**Fig. S1** The corresponding fine spectra of Si 2p of TC.

**Fig. S2** XRD patterns of TC treated with strong acids and bases.

**Fig. S3** Component characterization of TC.

**Fig. S4** Electrochemical performance of symmetrical SCs using TC as electrodes in aqueous and organic electrolyte, respectively.

**Fig. S5** Characterizations of average particle size distribution and morphology.

**Fig. S6** Electrochemical performance of symmetrical SCs using TC<sub>1kg</sub> as electrodes in 6.0 mol L<sup>-1</sup> KOH/H<sub>2</sub>O electrolyte.

**Fig. S7** Cycling stability and Coulombic efficiency of YP50F in KOH/H<sub>2</sub>O electrolyte.

**Table S1** Comparison of TC with carbon derived from CaC<sub>2</sub>, CaCO<sub>3</sub> and others on parameters and capacitance properties.

**Table S2** Collection for the  $R_s$ ,  $R_{ct}$ ,  $R_w$ , and  $R_{ESR}$  of TC and YP50F in aqueous and organic electrolytes.

**Table S3** Cost evaluation for the preparation of 1 kg of TC.

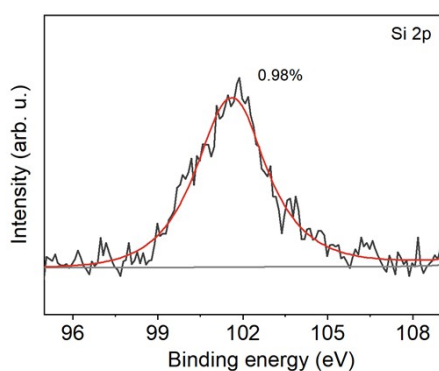

**Fig. S1** The corresponding fine spectra of Si 2p of TC.

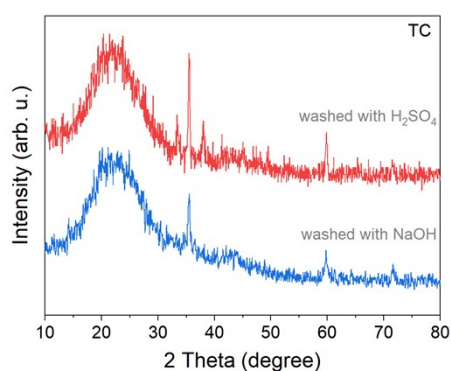

**Fig. S2** XRD patterns of TC treated by 5 mol L<sup>-1</sup> H<sub>2</sub>SO<sub>4</sub> and 10 mol L<sup>-1</sup> NaOH solutions, respectively.

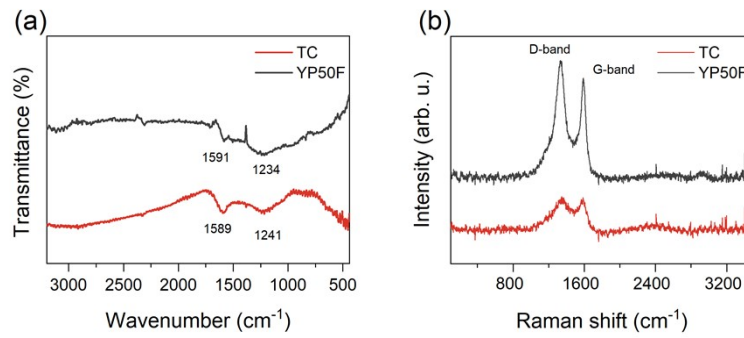

**Fig. S3** Component characterization of TC. a) FTIR analysis; b) Raman spectra. The data of YP50F are provided for comparison.

FT-IR spectral data of TC show two major adsorption bands at  $1241\text{ cm}^{-1}$  and  $1589\text{ cm}^{-1}$ , corresponding to the backbone vibration of C=C and the stretching vibration of C-O-C, respectively. The presence of oxygen-containing groups on the surface of TC is demonstrated, which can improve the hydrophilicity of TC in aqueous/organic electrolytes. Typical D-peak ( $\sim 1345\text{ cm}^{-1}$ ) and G-peaks ( $\sim 1586\text{ cm}^{-1}$ ) can be observed, and the positions of the peaks approximately overlap with YP50F.

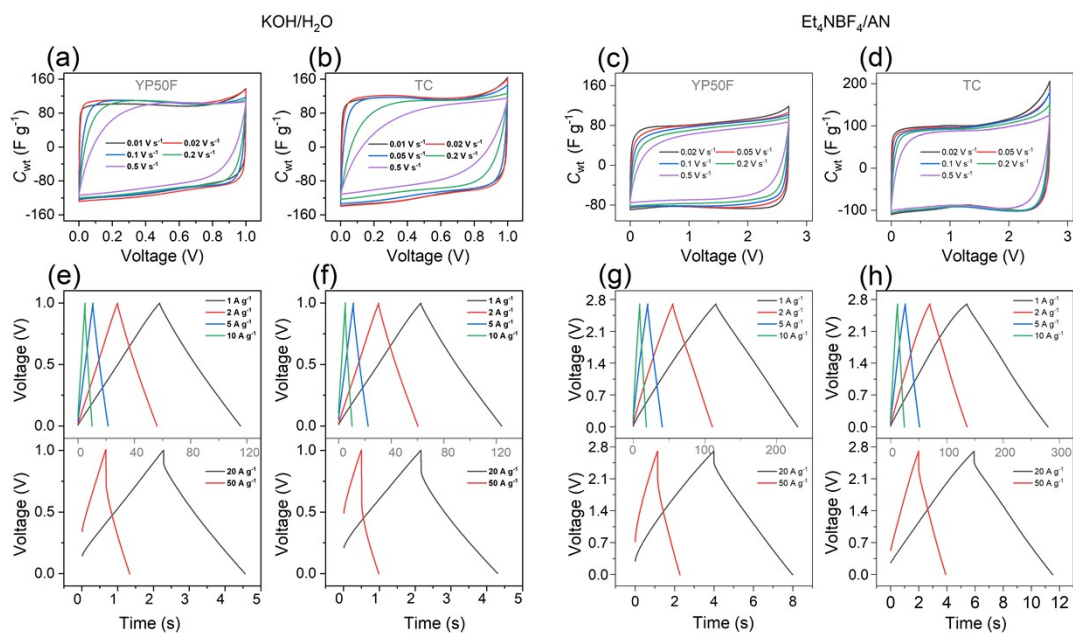

**Fig. S4** Electrochemical performance of symmetrical SCs using TC as electrodes in aqueous and organic electrolytes, respectively. a, b) CV curves at 0.01-0.5 V s<sup>-1</sup> in KOH/H<sub>2</sub>O; c, d) CV curves at 0.02-0.5 V s<sup>-1</sup> in Et<sub>4</sub>NBF<sub>4</sub>/AN; e, f) GCD curves at different current densities (i.e., 1-50 A g<sup>-1</sup>) in KOH/H<sub>2</sub>O, respectively; g, h) GCD curves at 1-50 A g<sup>-1</sup> in Et<sub>4</sub>NBF<sub>4</sub>/AN. The data of YP50F are also provided for comparison.

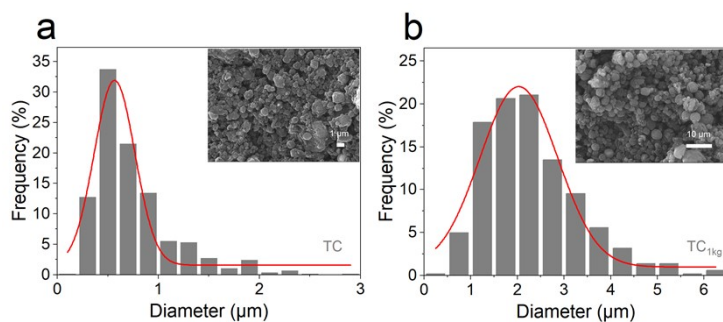

**Fig. S5** Characterizations of average particle size distribution. a) TC; b) TC<sub>1kg</sub>. The inset is the corresponding SEM image.

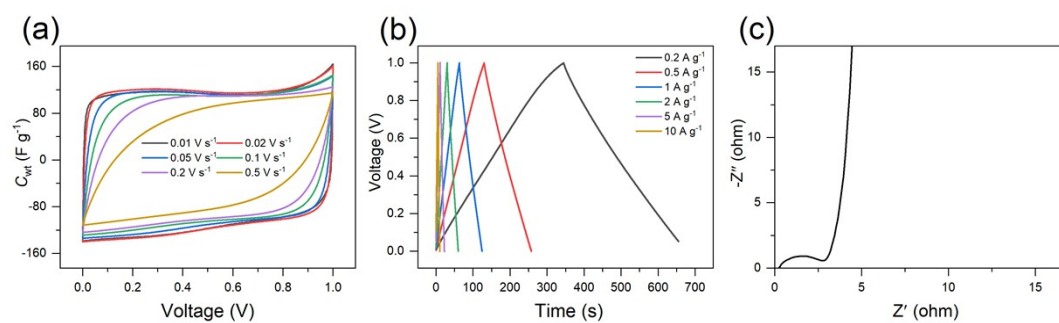

**Fig. S6** Electrochemical performance of symmetrical SCs using TC<sub>1kg</sub> as electrodes in 6.0 mol L<sup>-1</sup> KOH/H<sub>2</sub>O electrolyte. a) CV curves at 0.01-0.5 V s<sup>-1</sup>); b) GCD curves at 0.2-10 A g<sup>-1</sup>); c) Nyquist plots.

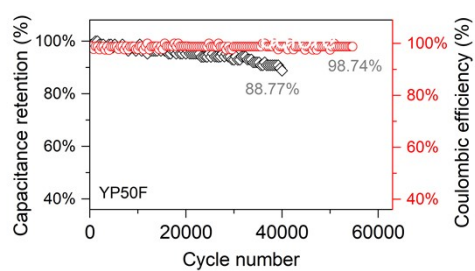

**Fig. S7** Cycling stability and Coulombic efficiency of YP50F at 5 A g<sup>-1</sup> in 6.0 mol L<sup>-1</sup> KOH/H<sub>2</sub>O electrolyte.

**Table S1** Comparison of TC with carbon derived from CaC<sub>2</sub>, CaCO<sub>3</sub> and others on parameters and capacitance properties.

| Various carbon                    | Samples                 | SSA     | Electrolyte                       | Current density /Scan rate         | C <sub>wt</sub> (F g <sup>-1</sup> ) | Note                                              | Refs.      |
|-----------------------------------|-------------------------|---------|-----------------------------------|------------------------------------|--------------------------------------|---------------------------------------------------|------------|
| CaC <sub>2</sub> -derived carbon  | TC                      | 1090    | 6M KOH                            | 1 A g <sup>-1</sup>                | 127                                  | /                                                 | This study |
|                                   | CDC-Zn                  | 191     | 6M KOH                            | 1 mV s <sup>-1</sup>               | 105                                  | /                                                 | 1          |
|                                   | OACM                    | 687     | 6M KOH                            | 0.15 A g <sup>-1</sup>             | 121                                  | /                                                 | 2          |
|                                   | CCDPC                   | 525     | 1M KOH                            | 0.5 A g <sup>-1</sup>              | 116                                  | /                                                 | 3          |
|                                   | CCDC                    | 612     | 6M KOH                            | 10 mV s <sup>-1</sup>              | 108                                  | /                                                 | 4          |
|                                   | CaC <sub>2</sub> -CDC   | 800     | 6M KOH                            | 10 mV s <sup>-1</sup>              | 126                                  | /                                                 | 5          |
| CaCO <sub>3</sub> -derived carbon | Sample (850°C)          | 325     | /                                 | 5 mV s <sup>-1</sup>               | 84                                   | /                                                 | 6          |
|                                   | Carbon-DC               | 652     | 6M KOH                            | 1 A g <sup>-1</sup>                | 176                                  | /                                                 | 7          |
|                                   | 3-6-800                 | 544     | /                                 | 100 mV s <sup>-1</sup>             | 190                                  | /                                                 | 8          |
|                                   | NPC4                    | 1133    | 1M H <sub>2</sub> SO <sub>4</sub> | 0.5 A g <sup>-1</sup>              | 162                                  | 5.9 at. %<br>N-doped                              | 9          |
| CO <sub>2</sub> converted carbon  | SHSG-8                  | 709     | 1 M EMIMBF <sub>4</sub>           | 2 A g <sup>-1</sup>                | 172                                  | /                                                 | 10         |
|                                   | TC-1                    | 1020    | 6M KOH                            | 1 A g <sup>-1</sup>                | 140                                  | /                                                 | 11         |
|                                   | CPC1_700                | 1262    | 6M KOH                            | 1 A g <sup>-1</sup>                | 270                                  | 0.45 at. %<br>B-doped                             | 12         |
| Biomass-derived carbon            | PGCS-1-1100             | 540     | 6M KOH                            | 1 A g <sup>-1</sup>                | 213                                  | /                                                 | 13         |
|                                   | FC-0-8                  | 479     | 6M KOH                            | 1 A g <sup>-1</sup>                | 84.3                                 | /                                                 | 14         |
|                                   | CNS/CF <sub>0.15</sub>  | 1068    | 6M KOH                            | 0.5 A g <sup>-1</sup>              | 355                                  | /                                                 | 15         |
| MOF-derived carbon                | NHCSF-3                 | 816     | 6M KOH                            | 1 A g <sup>-1</sup>                | 254                                  | 20 at. %<br>N-doped                               | 16         |
|                                   | HPCNFs-N                | 418     | 2M H <sub>2</sub> SO <sub>4</sub> | 5 A g <sup>-1</sup>                | 264                                  | /                                                 | 17         |
|                                   | MIL-101-NH <sub>2</sub> | 2987    | 1M H <sub>2</sub> SO <sub>4</sub> | 0.1 A g <sup>-1</sup>              | 272                                  | 9.6 at. %<br>N-doped                              | 18         |
| Carbon derived from others        | MWCNT                   | 130-410 | 6M KOH                            | 10 mV s <sup>-1</sup>              | 80-135                               | /                                                 | 19         |
|                                   | GH-H                    | 951     | 5M KOH                            | 1 A g <sup>-1</sup>                | 220                                  | C/N=<br>36.7                                      | 20         |
|                                   | HGF-EC                  | 2630    | 1M EMIMIBF <sub>4</sub>           | 1 A g <sup>-1</sup>                | 298                                  | /                                                 | 21         |
|                                   | N/P-TRGO                | 152     | 6M KOH                            | <sup>6</sup> 0.1 A g <sup>-1</sup> | 165                                  | 2.9 at. %<br>N-doped<br>+<br>4.3 at. %<br>P-doped | 22         |
|                                   | GNS/CB-2                | 586     | 6M KOH                            | 10 mV s <sup>-1</sup>              | 175                                  | /                                                 | 23         |

**Table S2** Collection for the  $R_s$ ,  $R_{ct}$ ,  $R_w$ , and  $R_{ESR}$  of TC and YP50F in aqueous and organic electrolytes.

| Samples                                                  | $R_s$ ( $\Omega$ ) | $R_{ct}$ ( $\Omega$ ) | $R_w$ ( $\Omega$ ) | $R_{ESR}$ ( $\Omega$ ) |
|----------------------------------------------------------|--------------------|-----------------------|--------------------|------------------------|
| TC (KOH/H <sub>2</sub> O)                                | 0.27               | 0.67                  | 1.88               | 2.82                   |
| TC <sub>1kg</sub> (KOH/H <sub>2</sub> O)                 | 0.28               | 1.74                  | 3.18               | 5.20                   |
| YP50F (KOH/H <sub>2</sub> O)                             | 0.21               | 2.44                  | 2.82               | 5.47                   |
| TC (Et <sub>4</sub> NBF <sub>4</sub> /AN)                | 1.94               | 0.64                  | 1.72               | 4.30                   |
| TC <sub>1kg</sub> (Et <sub>4</sub> NBF <sub>4</sub> /AN) | 1.72               | 0.69                  | 3.61               | 6.03                   |
| YP50F (Et <sub>4</sub> NBF <sub>4</sub> /AN)             | 2.74               | 2.21                  | 8.14               | 13.09                  |

**Table S3** Cost evaluation for the preparation of 1 kg of TC.

|                     | Materials         | Consumption | Price (RMB) | Total (RMB) |
|---------------------|-------------------|-------------|-------------|-------------|
| Raw materials       | CaC <sub>2</sub>  | 1.3 kg      | 2.7         | 4           |
|                     | CaCO <sub>3</sub> | 1 kg        | 0.5         |             |
| Energy              | Ball milling      | 44 kWh      | 0.49        | 26.4        |
|                     | Drying            | 10 kWh      | 0.49        |             |
| Auxiliary materials | HCl               | 25 kg       | 0.4         | 15.6        |
|                     | N <sub>2</sub>    | 1.25 L      | 4.5         |             |

## References

1. K. Zhang, S. Tao, X. Xu, H. Meng, Y. Lu and C. Li, Preparation of mesoporous carbon materials through mechanochemical reaction of calcium

- carbide and transition metal chlorides, *Ind. Eng. Chem. Res.*, 2018, **57**, 6180-6188.
2. Y. Li, S. Li, X. Xu, J. Gu, X. He, H. Meng, Y. Lu and C. Li, Converting CO<sub>2</sub> into an oxygenated alkynyl carbon material with high electrochemical performance through a mechanochemical reaction with CaC<sub>2</sub>, *ACS Sustainable Chem. Eng.*, 2021, **9**, 9221-9229.
  3. J. Yang, Y. Chen, J. Peng, J. Zeng, G. Li, B. Chang, Y. Shen, X. Guo, G. Chen, X. Wang and L. Zheng, Green preparation and supercapacitive behaviors of calcium carbide derived porous carbon based on solvent free mechanochemical route, *J. Energy Storage*, 2022, **51**, 104473.
  4. L. Zheng, Y. Wang, X. Wang, X. Wang, H. An and L. Yi, The effects of surface modification on the supercapacitive behaviors of carbon derived from calcium carbide, *J. Mater. Sci.*, 2010, **45**, 6030-6037.
  5. C. Dai, X. Wang, Y. Wang, N. Li and J. Wei, Synthesis of nanostructured carbon by chlorination of calcium carbide at moderate temperatures and its performance evaluation, *Mater. Chem. Phys.*, 2008, **112**, 461-465.
  6. R. Liu, S. Yao, Y. Shen, Y. Tian and Q. Zhang, Preparation of N doped layered porous carbon and its capacitive deionization performance, *Materials*, 2023, **16**, 1435.
  7. Z. Xiao, Y. Zhu, H. Yi and X. Chen, A simple CaCO<sub>3</sub> assisted template carbonization method for producing nitrogen containing nanoporous carbon



- spheres and its electrochemical improvement by the nitridation of azodicarbonamide, *Electrochim. Acta*, 2015, **155**, 93-102.
8. F. Shen, M. Qiu, Y. Hua and X. Qi, Dual functional templated methodology for the synthesis of hierarchical porous carbon for supercapacitor, *ChemistrySelect*, 2018, **3**, 586-591.
  9. Z. Sun, W. Wang, J. Zhang, G. Wang, K. Wang, X. Liu, G. Ni and Y. Jiang, Nitrogen rich hierarchical porous carbon materials with interconnected channels for high stability supercapacitors, *New J. Chem.*, 2019, **43**, 1864-1873.
  10. C. Li, X. Zhang, K. Wang, X. Sun, G. Liu, J. Li, H. Tian, J. Li and Y. Ma, Scalable self propagating high temperature synthesis of graphene for supercapacitors with superior power density and cyclic stability, *Adv. Mater.*, 2016, **29**, 1604690.
  11. H. Liang, R. Shi, Y. Zhou, W. Jiang, T. Sun, Z. Zhang, L. Sun, J. Lian, H. Li and Y. Bu, Removing cost barriers to template carbon synthesis for high performance supercapacitors by establishing a zero emission chemical cycle from CO<sub>2</sub>, *ACS Energy Lett.*, 2022, **7**, 4381-4388.
  12. Y. K. Kim, J. H. Park and J. W. Lee, Facile nano templated CO<sub>2</sub> conversion into highly interconnected hierarchical porous carbon for high performance supercapacitor electrodes, *Carbon*, 2018, **126**, 215-224.

13. L. Wang, G. Mu, C. Tian, L. Sun, W. Zhou, P. Yu, J. Yin and H. Fu, Porous graphitic carbon nanosheets derived from cornstalk biomass for advanced supercapacitors, *ChemSusChem*, 2013, **6**, 880-889.
14. A. Guo, X. Zhang, B. Shao, S. Sang and X. Yang, Catalytic graphitization assisted synthesis of Fe<sub>3</sub>C/Fe/graphitic carbon with advanced pseudocapacitance, *RSC Adv.*, 2022, **12**, 7935-7940.
15. X. Zhang, B. Liu, X. Yan, X. Zhao, Y. Zhang, Y. Wei and Q. Cao, Design and structure optimization of 3D porous graphitic carbon nanosheets for high performance supercapacitor, *Microporous Mesoporous Mater.*, 2020, **309**, 11058.
16. Z. Li, H. Mi, L. Liu, Z. Bai, J. Zhang, Q. Zhang and J. Qiu, Nano sized ZIF-8 anchored polyelectrolyte decorated silica for nitrogen rich hollow carbon shell frameworks toward alkaline and neutral supercapacitors, *Carbon*, 2018, **136**, 176-186.
17. L. F. Chen, Y. Lu, L. Yu and X. W. Lou, Designed formation of hollow particle based nitrogen doped carbon nanofibers for high performance supercapacitors, *Energy Environ. Sci.*, 2017, **10**, 1777-1783.
18. Q. L. Zhu, P. Pachfule, P. Strubel, Z. Li, R. Zou, Z. Liu, S. Kaskel and Q. Xu, Fabrication of nitrogen and sulfur Co-doped hollow cellular carbon nanocapsules as efficient electrode materials for energy storage, *Energy Storage Mater.*, 2018, **13**, 72-79.

19. E. Frackowiak, K. Metenier, V. Bertagna and F. Beguin, Supercapacitor electrodes from multiwalled carbon nanotubes, *Appl. Phys. Lett.*, 2000, **77**, 2421-2423.
20. L. Zhang and G. Shi, Preparation of highly conductive graphene hydrogels for fabricating supercapacitors with high rate capability, *J. Phys. Chem. C*, 2011, **115**, 17206-17212.
21. Y. Xu, Z. Lin, X. Zhong, X. Huang, N. O. Weiss, Y. Huang and X. Duan, Holey graphene frameworks for highly efficient capacitive energy storage, *Nat. Commun.*, 2014, **5**, 4554.
22. C. Wang, Y. Zhou, L. Sun, Q. Zhao, X. Zhang, P. Wan and J. Qiu, N/P-Co doped thermally reduced graphene for high performance supercapacitor applications, *J. Phys. Chem. C*, 2013, **117**, 14912-14919.
23. J. Yan, T. Wei, B. Shao, F. Ma, Z. Fan, M. Zhang, C. Zheng, Y. Shang, W. Qian and F. Wei, Electrochemical properties of graphene nanosheet/carbon black composites as electrodes for supercapacitors, *Carbon*, 2010, **48**, 1731-1737.
